# Supplementary material for: How well do the CMIP6 models simulate dust aerosols?
Source: Copernicus journal article supplement (doi:10.5194/acp-2021-578), 2021-09-13
Supplement: Supplementary file 1 [file acp-2021-578-supplement.pdf]

*Supplementary of*

**How well do the CMIP6 models simulate dust aerosols?**

Alcide Zhao et al.

*Correspondence to:* Alcide Zhao (alcide.zhao@reading.ac.uk)ss

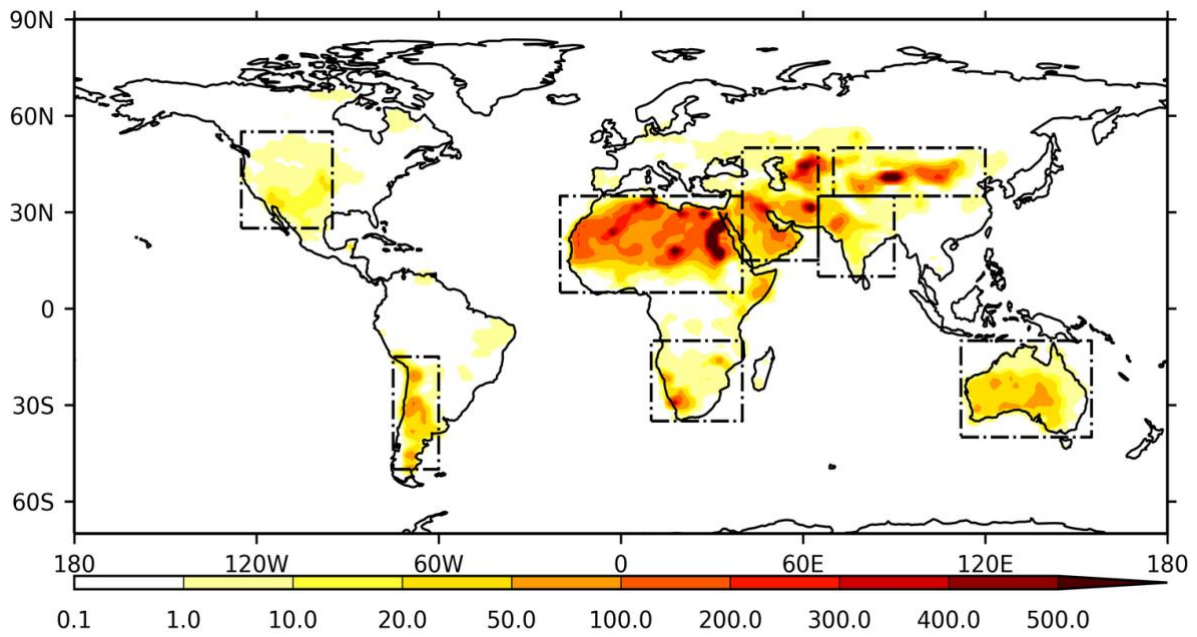

**Figure S1:** The CMIP6 AMIP MEM-simulated 2005-2014 annual mean dust emission ( $\text{g m}^{-2} \text{yr}^{-1}$ ) climatology overlaid by boxes used to define major dust emission source regions.

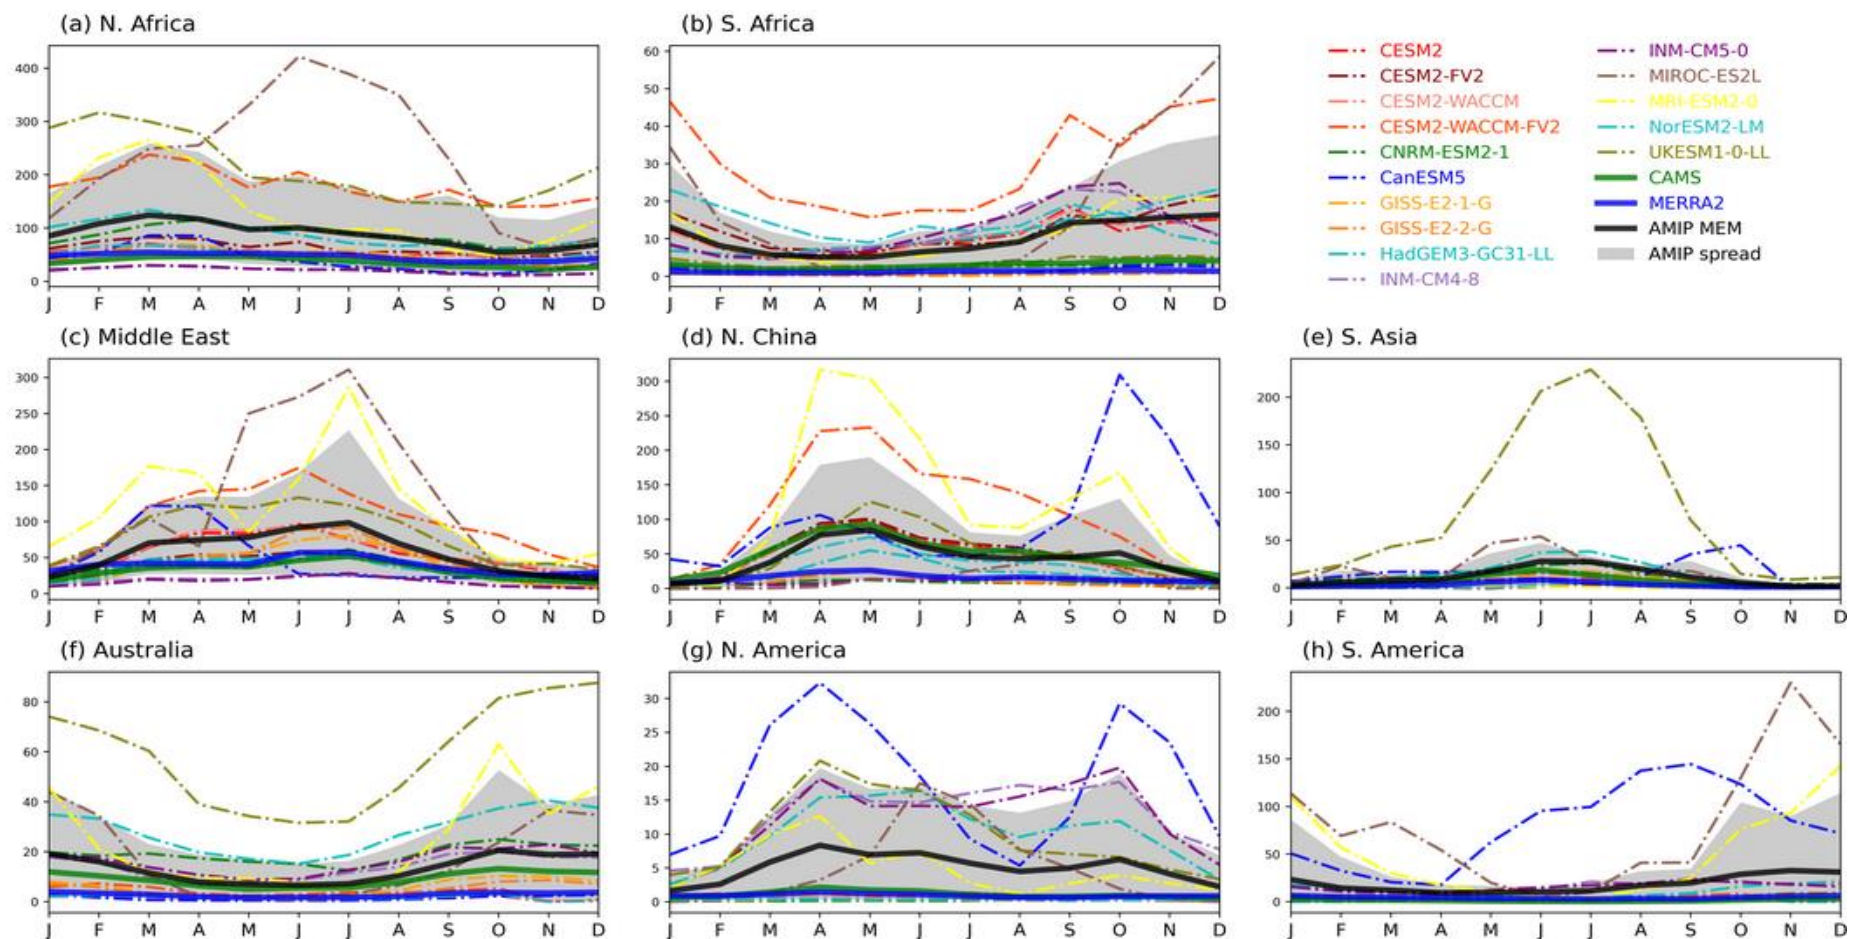

**Figure S2:** Seasonal cycles of the 2005-2014 mean dust emissions ( $\text{g m}^{-2} \text{yr}^{-1}$ ) over the eight major source regions. Dashed curves are for each individual model, while the AMIP MEM is shown in black solid, and the 10<sup>th</sup>- 90<sup>th</sup> percentiles of the multi-model spreads is shown in grey shadings. also shown are those for CAMS (green) and MERRA2 (blue) reanalysis.

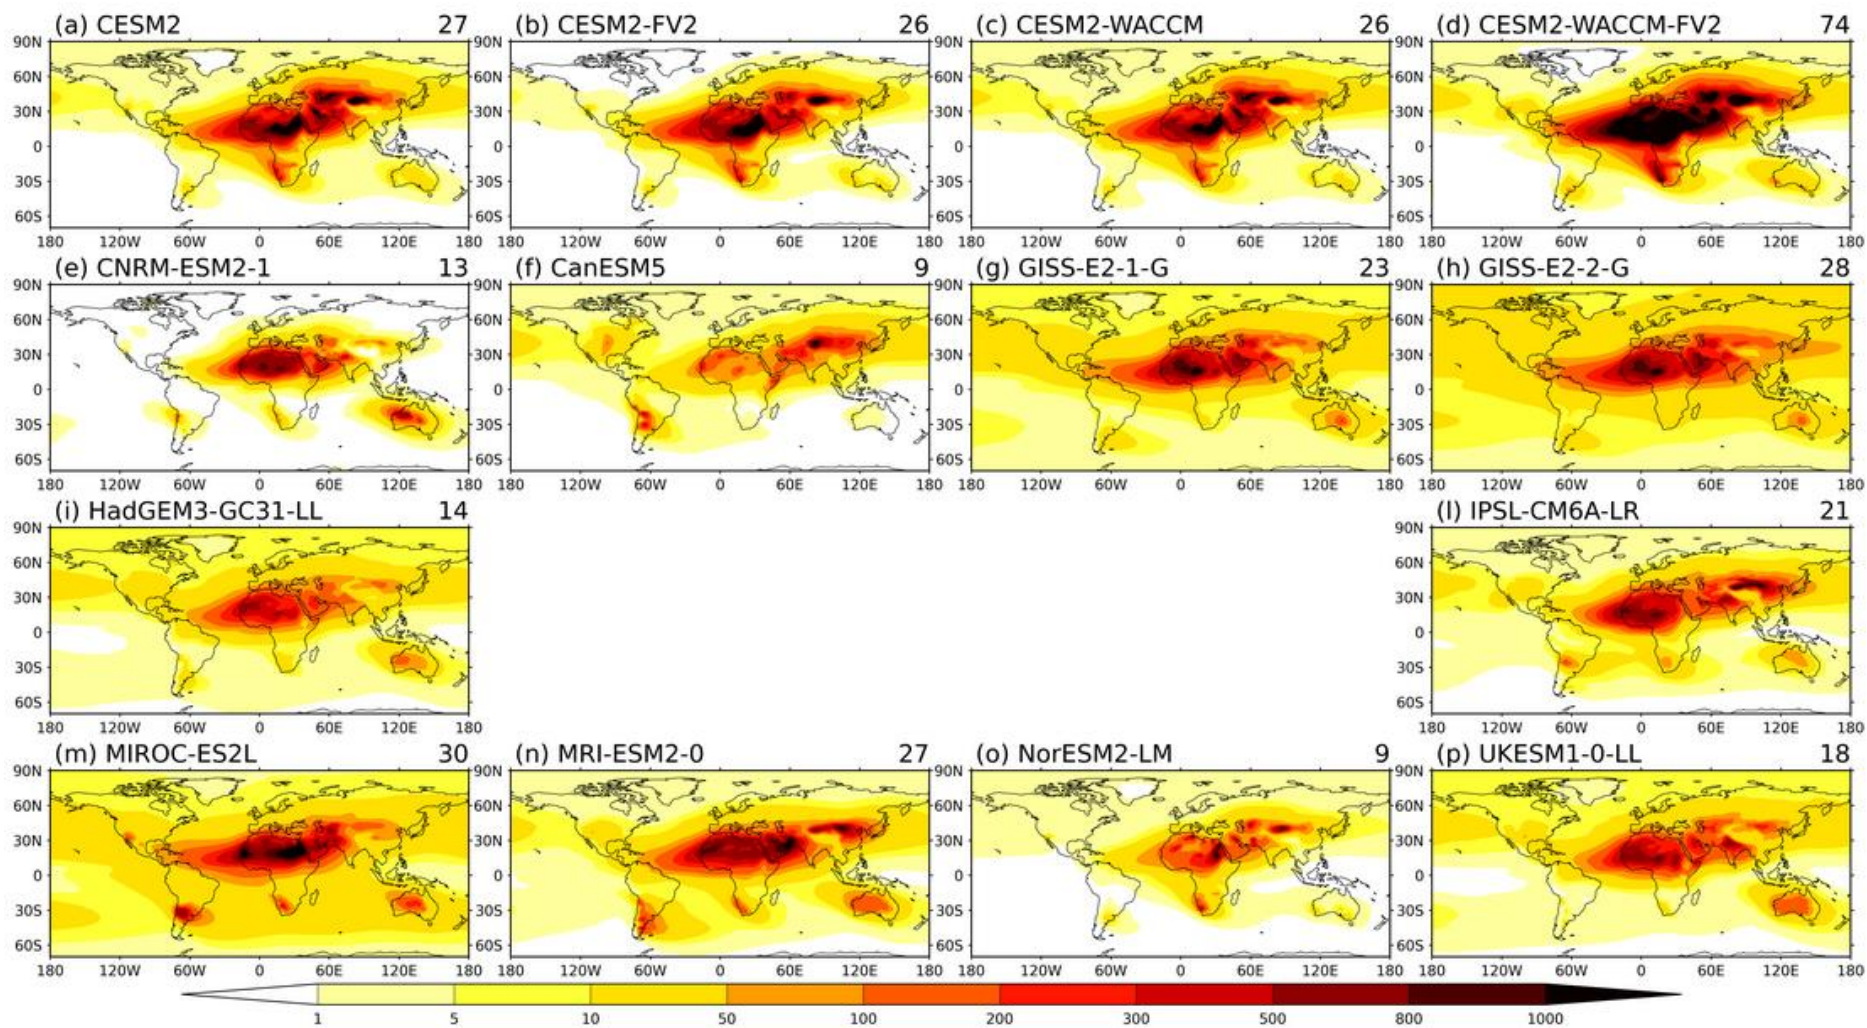

**Figure S3:** The CMIP6 AMIP model-simulated global annual mean (2005-2014) dust mass loading (mg m<sup>-2</sup>) climatology. The numbers on the top right of each panel denote the global total dust mass burdens (Tg).



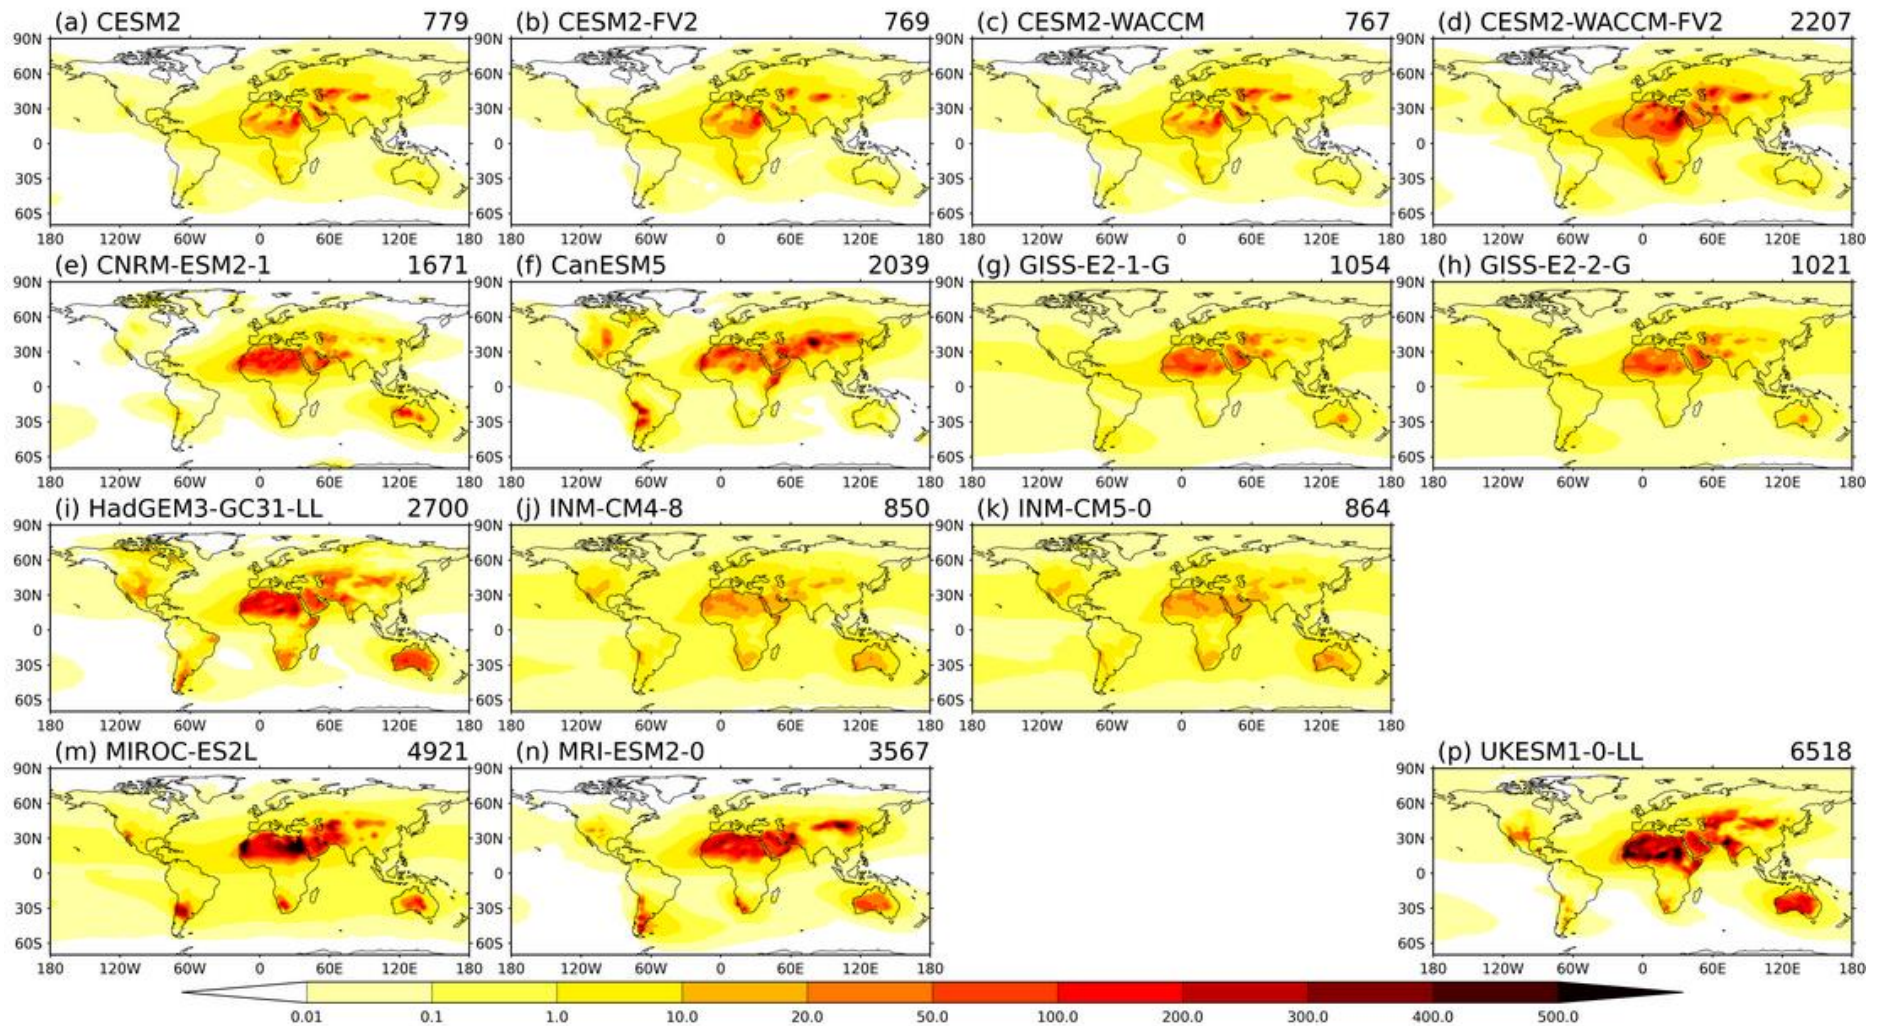

**Figure S4:** The CMIP6 AMIP model-simulated global annual mean (2005-2014) dry dust deposition fluxes (g m<sup>-2</sup> yr<sup>-1</sup>). The numbers on the top right of each panel denote the global total dry dust deposition (Tg yr<sup>-1</sup>).



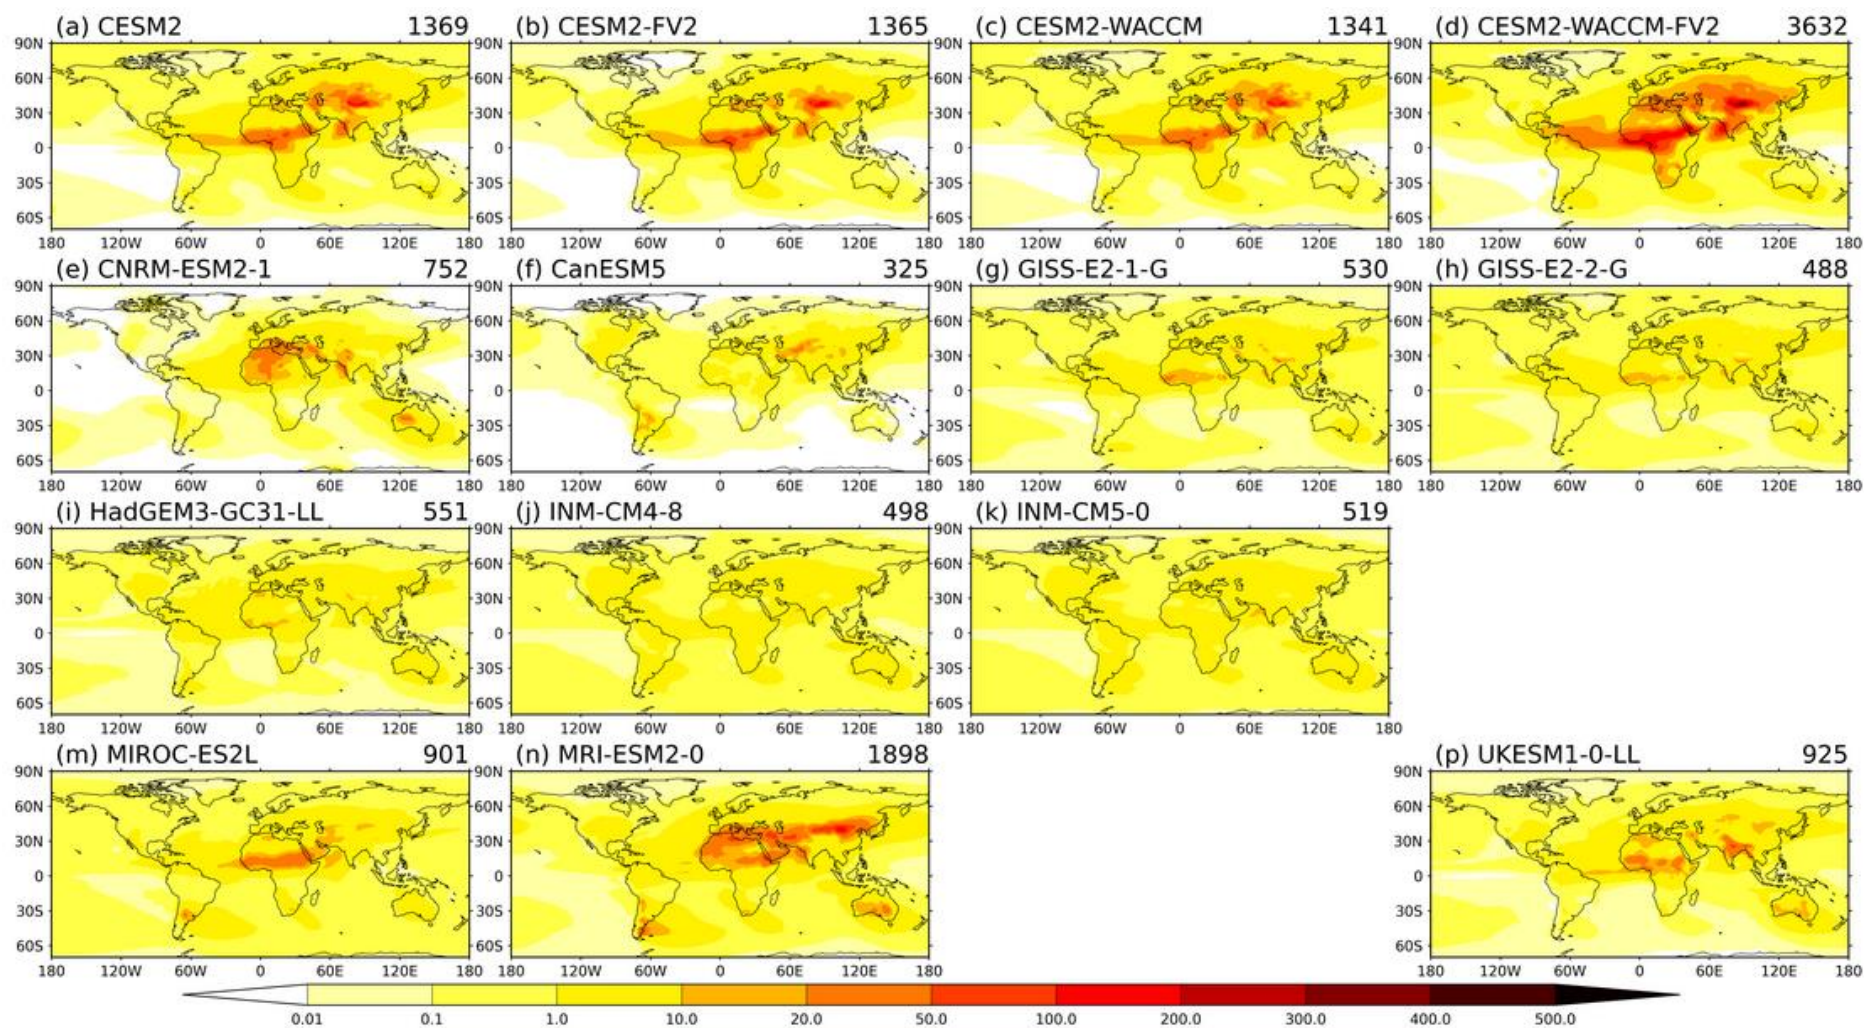

**Figure S5:** The CMIP6 AMIP model-simulated global annual mean (2005-2014) wet dust deposition fluxes ( $\text{g m}^{-2} \text{yr}^{-1}$ ). The numbers on the top right of each panel denote the global total wet dust deposition fluxes ( $\text{Tg yr}^{-1}$ ).

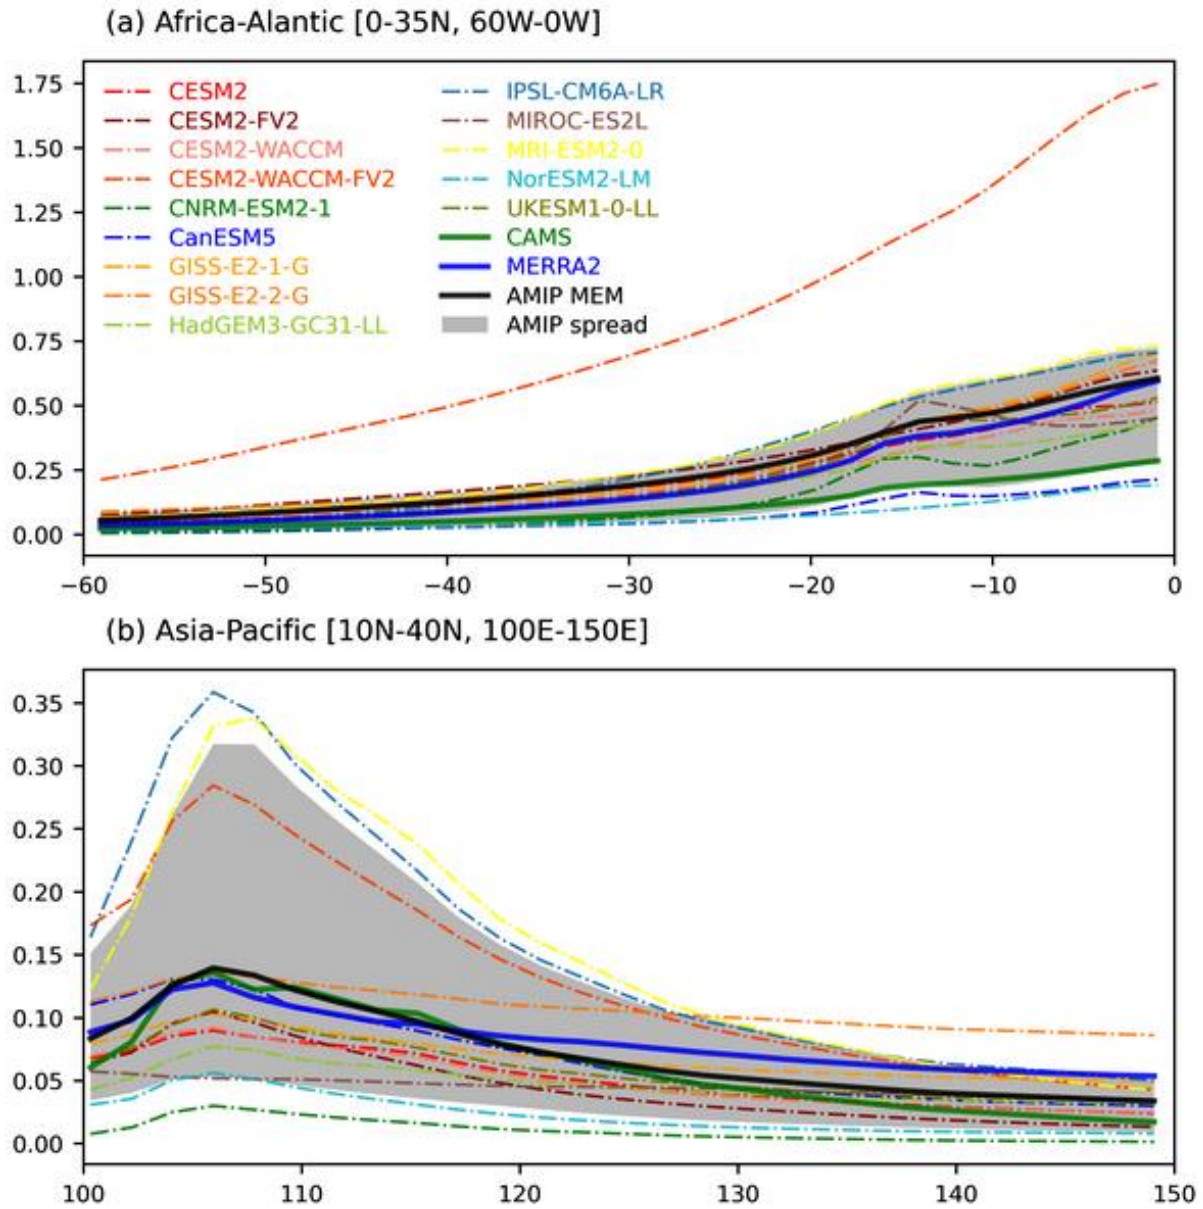

**Figure S6:** Meridionally averaged annual-mean dust mass loading ( $\text{kg m}^{-2}$ ) over (a) the Africa-Atlantic region and (b) the Asia-Pacific region.



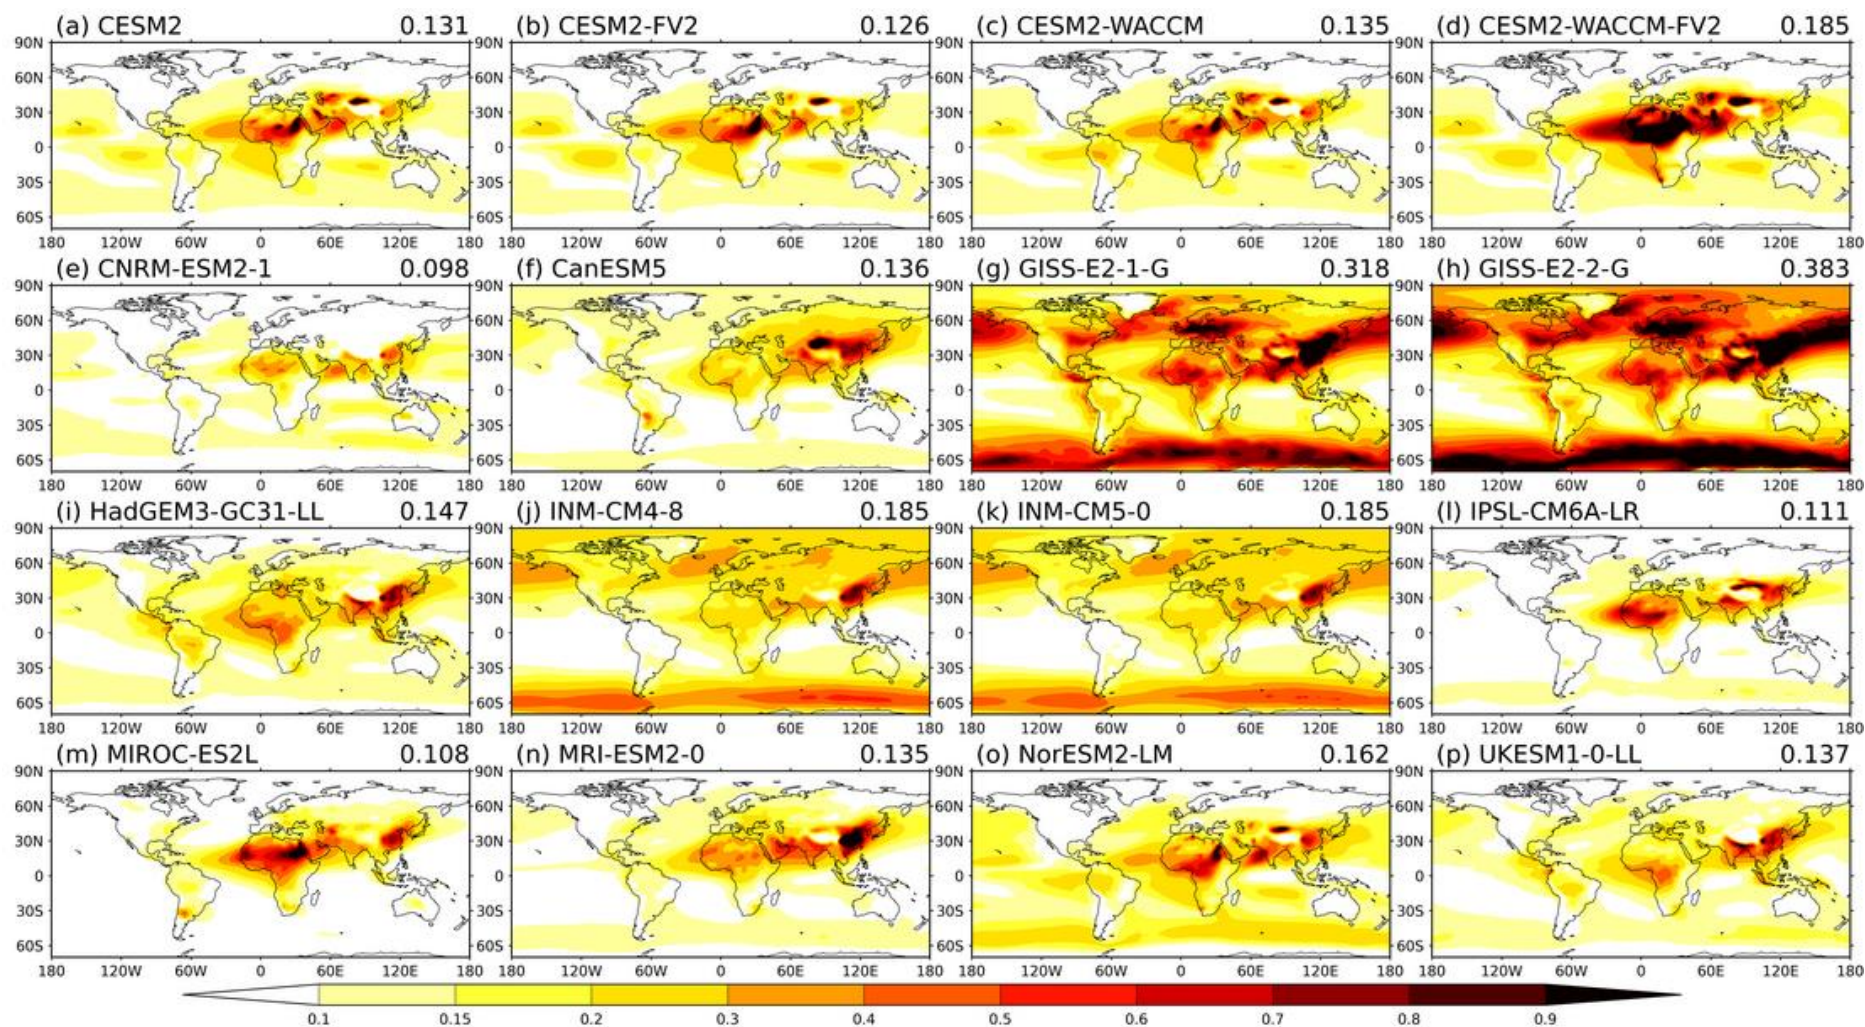

Figure S7: The CMIP6 AMIP models' simulated global annual mean (2005-2014) AOD climatology. The numbers on the top right of each panel denote the global means.



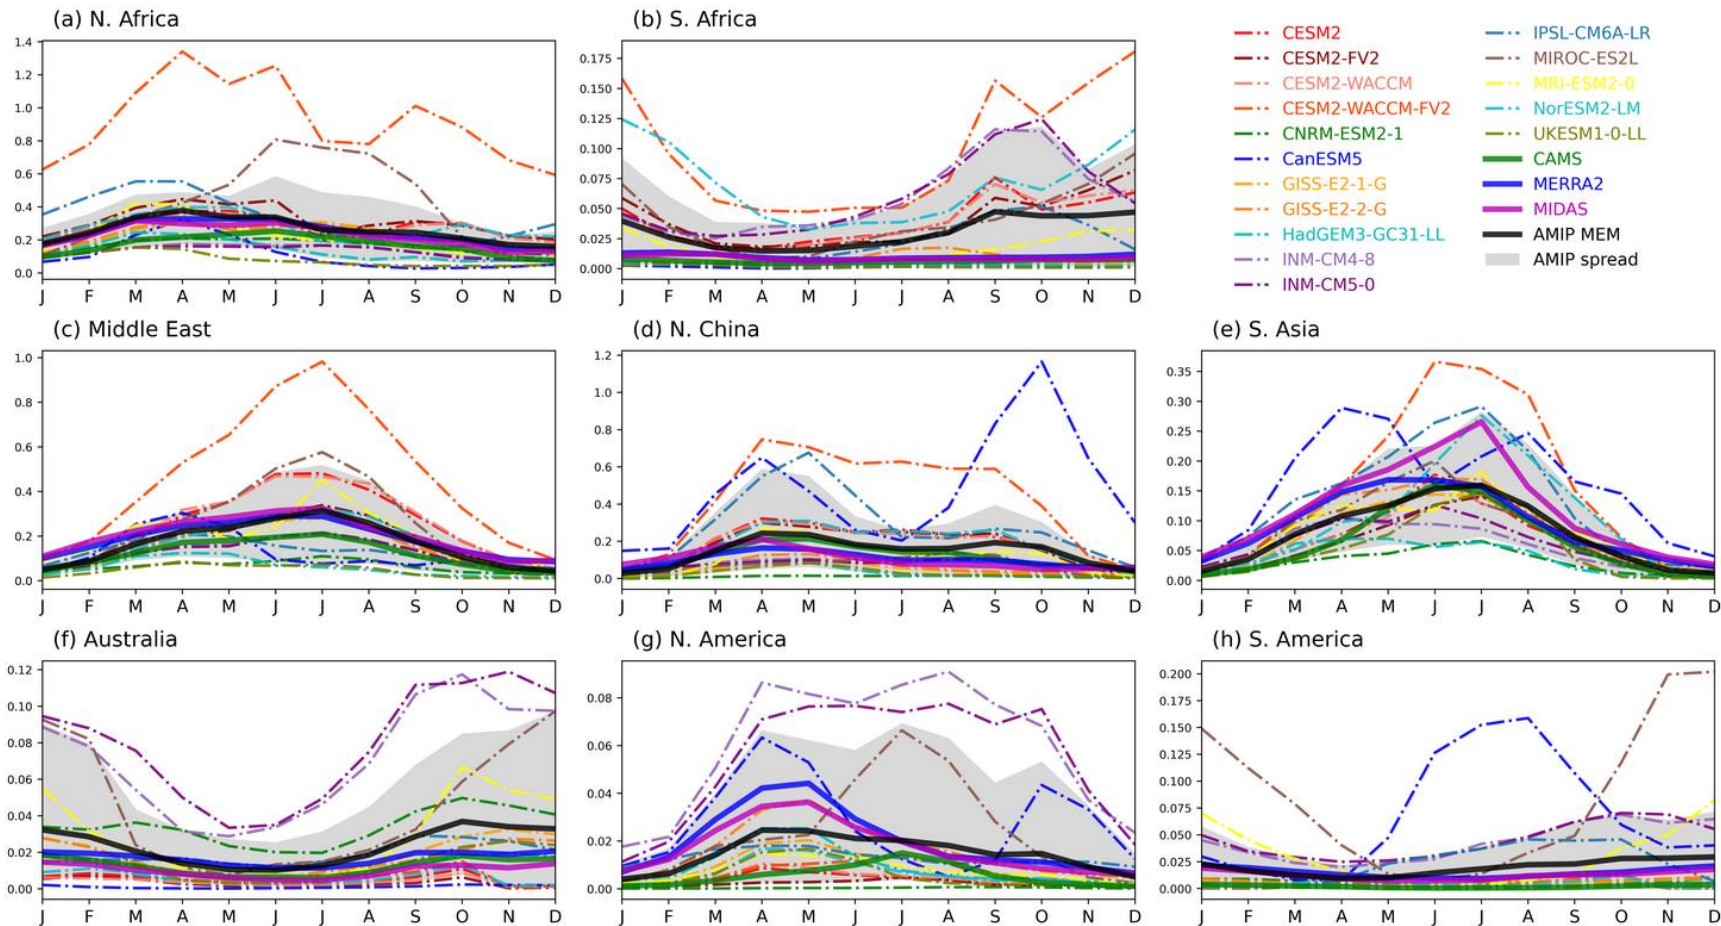

**Figure S8:** Seasonal cycles of the 2005-2014 mean DOD over the eight major dust source regions. Dashed curves are for each individual model, while the AMIP MEM is shown in black solid, and the 10<sup>th</sup>- 90<sup>th</sup> percentiles of the multi-model spreads is shown in grey shadings. Also shown are those for MIDAS (solid purple), CAMS (solid green) and MERRA2 (solid blue) reanalysis.
